# Supplementary material
Source: Springer Nature journal article supplement (https://www.springermedizin.de/resource/supplementary/12958_2011_820_MOESM3_ESM.pdf/9568926)

**d7**

Inter Imp

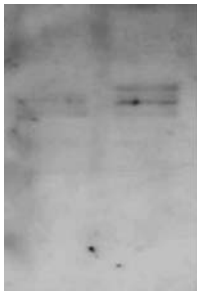

PC5/6

**d8**

Inter Imp

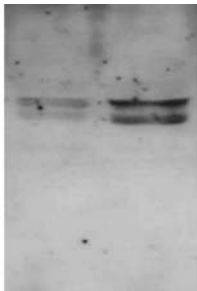**d10**

Inter Imp

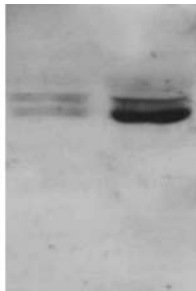

— 66 kDa

 $\beta$ -actin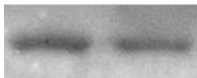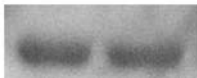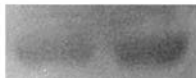

— 43 kDa

Supplement: MOESM3 [file 9568926]
